# Supplementary material for: Effect of a Phytogenic Water Additive on Growth Performance, Blood Metabolites and Gene Expression of Amino Acid Transporters in Nursery Pigs Fed with Low-Protein/High-Carbohydrate Diets
Source: MDPI journal article supplement (doi:10.3390/ani11020555), 2021-02-20
Supplement: s1 [file s1]

## Supplementary Tables

**Table S1.** Ingredients and chemical composition of the phytogetic water additive (Herbanimals<sup>®</sup>) used in this study (as-fed basis)

| <b>Items</b>                                   | <b>Herbanimals<sup>®</sup></b> |
|------------------------------------------------|--------------------------------|
| <b>Ingredients, %</b>                          |                                |
| <i>Pandanus amaryllifolius</i> Roxb            | 4.83                           |
| <i>Phyllanthus niruri</i>                      | 24.15                          |
| <i>Amomum cardamomum</i>                       | 4.83                           |
| <i>Zingiber zerumbet</i>                       | 13.04                          |
| <i>Apium Graveolens</i>                        | 14.49                          |
| <i>Anethum Graveolens</i>                      | 14.49                          |
| <i>Ocimum americanum</i>                       | 4.83                           |
| <i>Cinnamomum burmannii</i> Blume              | 4.83                           |
| <i>Myristica fragrans</i> Houtt                | 4.83                           |
| <i>Zingiber officinale</i> roscoe              | 9.66                           |
| <b>Analyzed Chemical Composition, mg/100 g</b> |                                |
| Calcium                                        | 4.99                           |
| Magnesium                                      | 4.16                           |
| Iron                                           | 1.01                           |
| Vitamin B6                                     | 0.46                           |
| Vitamin B12                                    | 0.69                           |
| Vitamin E                                      | 0.86                           |
| Vitamin B1                                     | 0.04                           |
| Vitamin B2                                     | 0.19                           |
| Arginine                                       | 15.58                          |
| Vitamin B3                                     | 0.14                           |
| Aspartic acid                                  | 10.45                          |
| Pantothenic acid                               | 1.39                           |

## Supplementary Figures

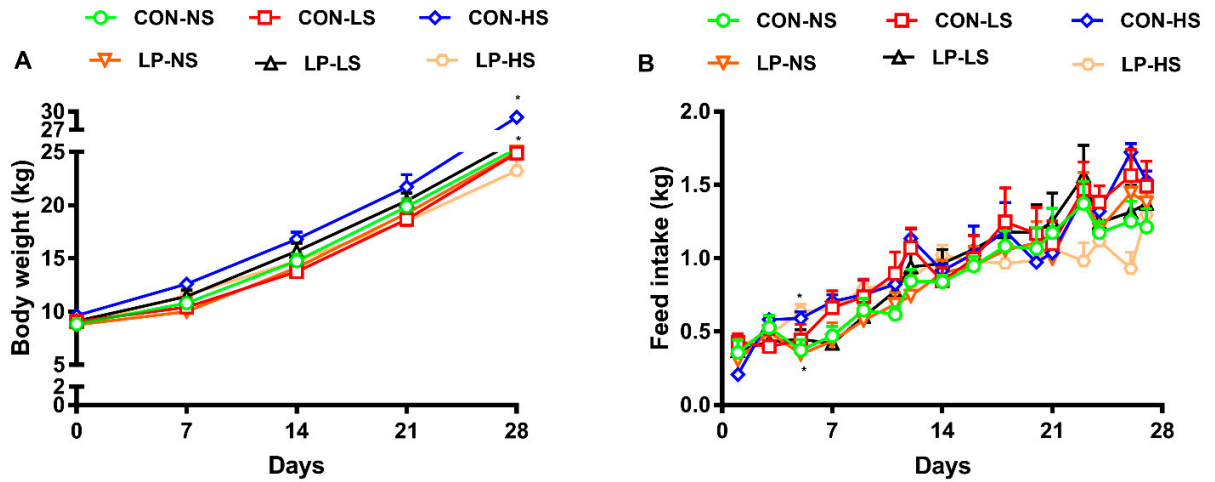

**Figure S1.** Body weight (A) and feed intake (B) of nursery pigs fed with two levels of dietary protein and three levels of a phytogenic water additive (PWA). The  $p$  values for the overall model effect of protein, PWA, time, protein  $\times$  PWA, protein  $\times$  time, PWA  $\times$  time and protein  $\times$  PWA  $\times$  time for body weight were 0.05, 0.49, 0.01, 0.49, 0.01, 0.05 and 0.01 and for feed intake were 0.07, 0.10, 0.01, 0.37, 0.68, 0.47 and 0.31, respectively. CON-NS: control diet with no PWA supplemented, CON-LS: control diet with a low dose of PWA (4 ml/L of water) supplemented, CON-HS: control diet with a high dose of PWA (8 ml/L of water) supplemented, LP-NS: low protein diet with no PWA added, LP-LS: low protein diet with a low dose of PWA (4 ml/L of water) added and LP-HS: low protein diet with a high dose of PWA (8 ml/L of water) added. \*Among groups, values with a common superscript symbol tended to be different ( $0.05 < p \leq 0.1$ ). Values are means  $\pm$  SEM.  $n=8$ /dietary group.

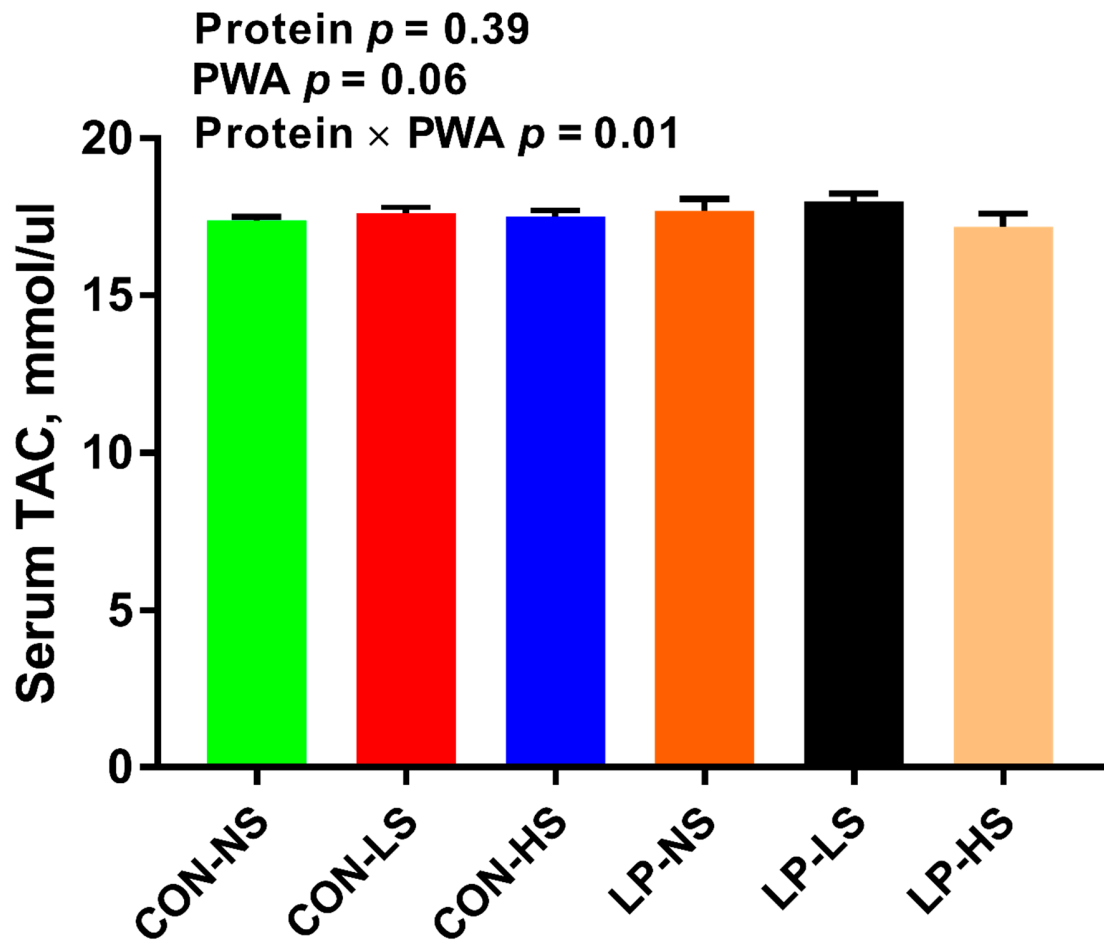

**Figure S2.** Serum total antioxidant capacity of nursery pigs fed with two levels of dietary protein and three levels of a phytogenic water additive (PWA). CON-NS: control diet with no PWA supplemented, CON-LS: control diet with a low dose of PWA (4 ml/L of water) supplemented, CON-HS: control diet with a high dose of PWA (8 ml/L of water) supplemented, LP-NS: low protein diet with no PWA added, LP-LS: low protein diet with a low dose of PWA (4 ml/L of water) added and LP-HS: low protein diet with a high dose of PWA (8 ml/L of water) added. Values are means  $\pm$  SEM.  $n=8$ /dietary group.
